# Supplementary material for: Whole-Genome Resequencing of Twenty Branchiostoma belcheri Individuals Provides a Brand-New Variant Dataset for Branchiostoma
Source: Biomed Res Int. 2020 Jan 24;2020:3697342. doi: 10.1155/2020/3697342 (PMC7008246; doi:10.1155/2020/3697342)
Supplement: Supplementary 1 — Table S1: The genomic mapping results of all B. belcheri individuals in this study. [file 3697342.f1.xlsx]

## Sheet: Sheet1
Table S1. The genomic mapping results of all B. belcheri individuals in this study.
Sample	Raw reads	Clean reads	Mapped reads	Mapped ratio (%)	Uniq mamped reads	Uniq mamped reads ratio (%)	Multiple hit reads	Multiple hit reads ratio (%)	Properly mapped reads	Properly mapped reads ratio (%)	Single mapped reads	Single mapped reads ratio (%)	Hard clipped reads	Hard clipped reads ratio (%)	Depth (X)	Polymorphism (%)	Coverage 1X (%)
BB_Male1	44114632	43885024	42243757	96.26	34290236	78.14	7953521	18.12	36781552	83.81	589449	1.34	1970378	4.49	13.04	3.07	86.09
BB_Male2	41274682	41012848	39327722	95.89	31899199	77.78	7428523	18.11	33578040	81.87	692796	1.69	1853259	4.52	12.17	3.04	86.7
BB_Male3	43130836	42897930	41053672	95.7	33303701	77.63	7749971	18.07	35034366	81.67	727514	1.7	1945207	4.53	12.69	3.12	86.6
BB_Male4	45915202	45674876	43820708	95.94	35588008	77.92	8232700	18.02	37586342	82.29	736830	1.61	2068830	4.53	13.54	3.12	86.65
BB_Male5	49463716	49233046	47271411	96.02	38343691	77.88	8927720	18.13	40803034	82.88	752701	1.53	2215236	4.5	14.61	3.18	86.49
BB_Male6	41734308	41520068	39886922	96.07	32362582	77.94	7524340	18.12	34161194	82.28	700560	1.69	1867379	4.5	12.35	3.06	86.14
BB_Male7	37587766	37362618	35821114	95.87	29116308	77.93	6704806	17.95	30694398	82.15	630370	1.69	1673796	4.48	11.08	2.93	85.81
BB_Male8	43835218	43532754	41780961	95.98	33867795	77.8	7913166	18.18	35581418	81.73	745827	1.71	1984156	4.56	12.93	3.12	86.6
BB_Male9	40378470	40158296	38450579	95.75	31194519	77.68	7256060	18.07	32685366	81.39	745831	1.86	1807066	4.5	11.91	3.02	86.49
BB_Male10	38024466	37793532	36247624	95.91	29385382	77.75	6862242	18.16	30918416	81.81	669478	1.77	1704760	4.51	11.21	2.95	85.84
BB_Female1	40737494	40462332	38851551	96.02	31534307	77.93	7317244	18.08	33126874	81.87	690297	1.71	1841116	4.55	12.02	2.97	86.08
BB_Female2	39294422	39111470	37548055	96	30431040	77.81	7117015	18.2	32189028	82.3	629975	1.61	1767920	4.52	11.61	3.01	86.16
BB_Female3	45074570	44876004	42927757	95.66	34812565	77.58	8115192	18.08	36904270	82.24	733043	1.63	2020369	4.5	13.25	3.09	86.37
BB_Female4	51076032	50810364	48840662	96.12	39524362	77.79	9316300	18.34	42677112	83.99	665224	1.31	2283210	4.49	15.04	3.17	86.37
BB_Female5	37747132	37611242	35960749	95.61	29136183	77.47	6824566	18.15	31521484	83.81	513685	1.37	1649190	4.38	11.01	2.67	85.57
BB_Female6	45734938	45484396	43738189	96.16	35489809	78.03	8248380	18.13	37550614	82.56	726323	1.6	2060878	4.53	13.53	3.14	86.45
BB_Female7	37719652	37478310	35922565	95.85	29169362	77.83	6753203	18.02	30656652	81.8	646861	1.73	1699700	4.54	11.11	2.95	85.74
BB_Female8	44468780	44001858	41441734	94.18	33516243	76.17	7925491	18.01	35552310	80.8	687522	1.56	2021796	4.59	12.74	3.06	86.65
BB_Female9	38781426	38557444	36974687	95.9	29990835	77.78	6983852	18.11	31534514	81.79	661155	1.71	1742630	4.52	11.45	2.97	86.13
BB_Female10	42382180	42136364	40460892	96.02	32861160	77.99	7599732	18.04	34391880	81.62	743718	1.77	1920539	4.56	12.53	3.09	86.21
SRR1174914	/	210710342	195932673	92.99	162267565	77.01	33476099	15.89	162456574	77.1	7126215	3.38	3401245	1.61	42.3	3.69	89.69
Averagea	42423796	42180039	4.04286e+07	95.8455	3.27909e+07	77.74	7.6377e+06	18.1045	3.46964e+07	82.233	684458	1.6295	1.90487e+06	4.37667	12.491	3.0365	86.257
a The average of above values excluding SRR1174914
