# Supplementary material for: Whole-Genome Resequencing of Twenty Branchiostoma belcheri Individuals Provides a Brand-New Variant Dataset for Branchiostoma
Source: Biomed Res Int. 2020 Jan 24;2020:3697342. doi: 10.1155/2020/3697342 (PMC7008246; doi:10.1155/2020/3697342)
Supplement: Supplementary 2 — Table S2: Transitions and transversions in each B. belcheri individual. [file 3697342.f2.xlsx]

## Sheet: Sheet1
Table S2. Transitions and transversions found in each B. belcheri individual.
Accession	Transitions	Transversions	Ts/Tv
BB_Male1	5701800	4337398	1.31457
BB_Male2	5641683	4293151	1.31411
BB_Male3	5780171	4401308	1.31328
BB_Male4	5787377	4405254	1.31374
BB_Male5	5888123	4477387	1.31508
BB_Male6	5674997	4320857	1.3134
BB_Male7	5453275	4150709	1.31382
BB_Male8	5784311	4401196	1.31426
BB_Male9	5597855	4262056	1.31342
BB_Male10	5480346	4168159	1.31481
BB_Female1	5508686	4195304	1.31306
BB_Female2	5547851	4222568	1.31386
BB_Female3	5728125	4363117	1.31285
BB_Female4	5880152	4476662	1.31351
BB_Female5	5020050	3810987	1.31726
BB_Female6	5819499	4431009	1.31336
BB_Female7	5487027	4176856	1.31367
BB_Female8	5676169	4322591	1.31314
BB_Female9	5512305	4196028	1.3137
BB_Female10	5737112	4365076	1.31432
SRR1174914	6806369	5194791	1.31
Averagea	5.63535e+06	4.28888e+06	1.31394
a The average of above values excluding SRR1174914.
