# Supplementary material for: Whole-Genome Resequencing of Twenty Branchiostoma belcheri Individuals Provides a Brand-New Variant Dataset for Branchiostoma
Source: Biomed Res Int. 2020 Jan 24;2020:3697342. doi: 10.1155/2020/3697342 (PMC7008246; doi:10.1155/2020/3697342)
Supplement: Supplementary 3 — Table S3: Comparison of polymorphism rates between each B. belcheri individual. [file 3697342.f3.xlsx]

## Sheet: Sheet1
Table S3. Comparison of polymorphism rates between each B. belcheri individual.
Sample	BB_Male1	BB_Male2	BB_Male3	BB_Male4	BB_Male5	BB_Male6	BB_Male7	BB_Male8	BB_Male9	BB_Male10	BB_Female1	BB_Female2	BB_Female3	BB_Female4	BB_Female5	BB_Female6	BB_Female7	BB_Female8	BB_Female9	BB_Female10
BB_Male1	-	0.0296	0.0298	0.0298	0.03	0.0297	0.0294	0.0298	0.0296	0.0295	0.0296	0.0296	0.0298	0.03	0.0292	0.0299	0.0295	0.0297	0.0295	0.0298
BB_Male2	0.029632	-	0.0296	0.0297	0.0299	0.0296	0.0293	0.0296	0.0294	0.0293	0.029385	0.0294	0.0297	0.0299	0.0291	0.0297	0.0293	0.0295	0.0294	0.0296
BB_Male3	0.029814	0.029621	-	0.0296	0.03	0.0297	0.0295	0.0298	0.0296	0.0294	0.029549	0.0295	0.0298	0.03	0.0291	0.0299	0.0295	0.0297	0.0295	0.0297
BB_Male4	0.0298	0.029676	0.029574	-	0.0301	0.0297	0.0294	0.0298	0.0296	0.0295	0.02961	0.0296	0.0298	0.03	0.0292	0.0298	0.0294	0.0297	0.0296	0.0297
BB_Male5	0.030005	0.029893	0.030021	0.030074	-	0.0299	0.0296	0.0301	0.0298	0.0297	0.029885	0.029823	0.030023	0.0303	0.0295	0.0301	0.0297	0.03	0.0298	0.0299
BB_Male6	0.029689	0.029619	0.029671	0.029672	0.029861	-	0.0293	0.0297	0.0295	0.0293	0.029508	0.02951	0.029692	0.029944	0.029071	0.02984	0.029416	0.029618	0.029403	0.029609
BB_Male7	0.029427	0.029266	0.029464	0.029443	0.029638	0.029278	-	0.0295	0.0293	0.0291	0.029286	0.029211	0.029403	0.029708	0.028767	0.029557	0.029113	0.02941	0.029251	0.029372
BB_Male8	0.029814	0.029611	0.029781	0.029788	0.030084	0.029722	0.029529	-	0.029564	0.02954	0.0297	0.029595	0.029819	0.030118	0.029305	0.029928	0.02953	0.029714	0.02946	0.029796
BB_Male9	0.029606	0.029389	0.029562	0.029641	0.029844	0.029528	0.029267	0.029564	-	0.029324	0.029515	0.029377	0.029638	0.029893	0.029028	0.029721	0.029305	0.029513	0.029299	0.029589
BB_Male10	0.029485	0.029342	0.029446	0.029459	0.029692	0.029344	0.029055	0.02954	0.029324	-	0.029255	0.029309	0.029464	0.029713	0.028874	0.029578	0.029129	0.0294	0.029262	0.029379
BB_Female1	0.029631	0.0294	0.0295	0.0296	0.0299	0.0295	0.0293	0.0297	0.0295	0.0293	-	0.0294	0.0296	0.0299	0.029	0.0297	0.0293	0.0296	0.0294	0.0295
BB_Female2	0.02961	0.029423	0.029546	0.02962	0.0298	0.0295	0.0292	0.0296	0.0294	0.0293	0.029449	-	0.0296	0.0299	0.029	0.0296	0.0291	0.0295	0.0292	0.0296
BB_Female3	0.029758	0.029669	0.029753	0.029834	0.03	0.0297	0.0294	0.0298	0.0296	0.0295	0.029644	0.029573	-	0.03	0.0292	0.0299	0.0295	0.0297	0.0295	0.0297
BB_Female4	0.029962	0.029919	0.030043	0.030026	0.030323	0.0299	0.0297	0.0301	0.0299	0.0297	0.029922	0.029914	0.030006	-	0.0295	0.0301	0.0298	0.03	0.0299	0.0299
BB_Female5	0.029177	0.02912	0.029129	0.0292	0.029469	0.0291	0.0288	0.0293	0.029	0.0289	0.029035	0.028988	0.02921	0.029468	-	0.0293	0.0289	0.0291	0.0289	0.0291
BB_Female6	0.029861	0.029743	0.02987	0.029841	0.030144	0.0298	0.0296	0.0299	0.0297	0.0296	0.029687	0.029643	0.029915	0.030114	0.029348	-	0.0295	0.0298	0.0296	0.0299
BB_Female7	0.029509	0.029304	0.029485	0.029419	0.029743	0.0294	0.0291	0.0295	0.0293	0.0291	0.029313	0.029057	0.029458	0.029782	0.02891	0.02954	-	0.0294	0.0292	0.0294
BB_Female8	0.029726	0.029488	0.029746	0.029688	0.030023	0.0296	0.0294	0.0297	0.0295	0.0294	0.02956	0.029516	0.029726	0.029962	0.029114	0.029816	0.029431	-	0.0294	0.0297
BB_Female9	0.029525	0.029358	0.02949	0.029557	0.02981	0.0294	0.0293	0.0295	0.0293	0.0293	0.029442	0.029237	0.029491	0.029883	0.028923	0.029643	0.029245	0.029433	-	0.0295
BB_Female10	0.02976	0.029578	0.029707	0.029727	0.029901	0.0296	0.0294	0.0298	0.0296	0.0294	0.029511	0.029587	0.029684	0.029935	0.029102	0.02986	0.029432	0.029685	0.029514	-
Average rate	0.0296732	0.0295233	0.0296327	0.0296605	0.0299018	0.0295707	0.0293417	0.0296947	0.0294938	0.0293702	0.0295142	0.0294578	0.0296683	0.0299178	0.0291134	0.0297546	0.0293667	0.0295985	0.0294216	0.0296081
