# Supplementary material for: Whole-Genome Resequencing of Twenty Branchiostoma belcheri Individuals Provides a Brand-New Variant Dataset for Branchiostoma
Source: Biomed Res Int. 2020 Jan 24;2020:3697342. doi: 10.1155/2020/3697342 (PMC7008246; doi:10.1155/2020/3697342)
Supplement: Supplementary 4 — Table S4: Comparison of variations in different regions of B. belcheri genome. [file 3697342.f4.xlsx]

## Sheet: Sheet1
Table S4. Comparison of variations detected in different regions of B. belcheri.
Sample	Exon	Splicing	Up/Downstream	UTR	Intron	Intergenic	Total
BB_Male1	1259715	4193	1159796	543314	7172500	2766189	12905707
BB_Male2	1240304	4117	1148778	541671	7120261	2730285	12785416
BB_Male3	1261198	4341	1182802	552638	7310847	2811611	13123437
BB_Male4	1270712	4329	1180177	552462	7319075	2798625	13125380
BB_Male5	1290283	4427	1200225	557910	7467021	2854400	13374266
BB_Male6	1243894	4193	1155673	542353	7174211	2745014	12865338
BB_Male7	1208981	3975	1107650	525238	6860986	2622193	12329023
BB_Male8	1261597	4145	1179617	553518	7322070	2807660	13128607
BB_Male9	1232427	4193	1138580	536355	7071902	2700348	12683805
BB_Male10	1212683	4030	1108554	526225	6894720	2644527	12390739
BB_Female1	1209758	4068	1121205	527707	6973557	2653831	12490126
BB_Female2	1223166	4281	1141869	534687	7043248	2711457	12658708
BB_Female3	1253252	4304	1171292	547170	7254816	2769483	13000317
BB_Female4	1297150	4387	1195108	555745	7432428	2858116	13342934
BB_Female5	1137935	3668	1010629	486111	6194565	2417055	11249963
BB_Female6	1277872	4350	1190041	555506	7369201	2814798	13211768
BB_Female7	1212537	3980	1117691	528012	6908462	2643367	12414049
BB_Female8	1237157	4158	1167139	542503	7153585	2764081	12868623
BB_Female9	1213102	3957	1120182	529463	6947126	2671419	12485249
BB_Female10	1257083	4238	1169377	547877	7265479	2769568	13013622
SRR1174914	1488095	5464	1410667	627934	8753844	3441253	15727257
Difference valuea	248055	1297.3	262348	88610.8	1641041	713552	2.9549e+06
Average Variationb	1.24004e+06	4166.7	1.14832e+06	539323	7112803	2.7277e+06	1.27724e+07
Average Ratio (%)	0.0970878	0.000326228	0.0899066	0.0422258	0.556891	0.213563	1
aThe difference value of variations between high-depth sequencing data (SRR1174914) and our twenty low-depth sequencing data.
bThe average variation of above individuals excluding SRR1174914.
cThe average ratio of different regional variations in total genome excluding SRR1174914.
