# Supplementary material for: Whole-Genome Resequencing of Twenty Branchiostoma belcheri Individuals Provides a Brand-New Variant Dataset for Branchiostoma
Source: Biomed Res Int. 2020 Jan 24;2020:3697342. doi: 10.1155/2020/3697342 (PMC7008246; doi:10.1155/2020/3697342)
Supplement: Supplementary 5 — Table S5: Prediction of functional effects of nonsynonymous SNPs in selected housekeeping and immune genes. [file 3697342.f5.xlsx]

## Sheet: Sheet1
Table S5. Prediction of functional effects of nonsynonymous SNPs in selected housekeeping and immune genes
Gene Category	Gene	Gene ID	Probably damaging	Possibly damaging	Benign	Unknown	Total	nsSNP rate
Housekeeping genes	18S rRNA	LOC109483093	0	0	2	0	2	0.00238949
	UBE2G2	LOC109465405	0	0	1	0	1	0.00200803
	UBE2N	LOC109476771	0	0	0	0	0	0
	UBE2H	LOC109467103	0	0	0	0	0	0
	EF1A	LOC109481787	2	4	7	6	19	0.0233702
	EF1A	LOC109479546	0	0	2	1	3	0.0015748
	GAPDH	LOC109480062	0	0	1	0	1	0.000995025
	ATAT1	LOC109462042	0	4	12	17	33	0.0221328
	ribosomal protein S20	LOC109469864	0	0	0	0	0	0
Immune genes	NOS	LOC109475091	3	13	34	0	50	0.0112309
	NOS	LOC109469130	14	20	93	0	127	0.0318296
	C1Q	LOC109466271	4	3	7	0	14	0.01649
	ECSIT	LOC109482927	7	9	6	8	30	0.02457
	DDAH	LOC109462822	1	3	31	0	35	0.0413712
	TLR2	LOC109462695	6	7	45	0	58	0.0457053
	TLR3	LOC109466953	18	21	51	18	108	0.037037
	TLR6	LOC109464243	3	1	11	1	16	0.0126382
	MAPK2	LOC109466262	0	0	1	0	1	0.000933707
