# Supplementary material for: Whole-Genome Resequencing of Twenty Branchiostoma belcheri Individuals Provides a Brand-New Variant Dataset for Branchiostoma
Source: Biomed Res Int. 2020 Jan 24;2020:3697342. doi: 10.1155/2020/3697342 (PMC7008246; doi:10.1155/2020/3697342)
Supplement: Supplementary 6 — Table S6: Summary of damage variations in phagocytic intracellular digestion associated genes. [file 3697342.f6.xlsx]

## Sheet: Sheet1
Table S6. Summay of probably damage variations in phagocytic intracellular digestion related genes
Gene name	Chromosome	Gene ID	Chromosomal position	Protein position	Major AA	Minor AA	MAF	pph2_FPR
alpha2-macroglobulin (CD109 antigen-like)	NW_017803909.1	LOC109473663	4869136	20	A	P	0.0253165	0.0492
	NW_017803909.1	LOC109473663	4867484	33	L	M	0.0327869	0.0326
	NW_017803909.1	LOC109473663	4865986	109	G	A	0.0258303	0.0222
	NW_017803909.1	LOC109473663	4862509	281	N	Y	0.248826	0.046
	NW_017803909.1	LOC109473663	4859449	624	E	G	0.474074	0.0375
	NW_017803909.1	LOC109473663	4848666	743	V	G	0.111111	0.0424
arylsulfatase B	NW_017804242.1	LOC109482381	1215635	177	V	L	0.448087	0.0411
	NW_017804242.1	LOC109482381	1219778	268	L	F	0.0276498	0.0222
	NW_017804242.1	LOC109482381	1222312	352	I	M	0.0458716	0.0381
	NW_017804242.1	LOC109482381	1222313	353	L	M	0.0185185	0.0387
	NW_017804242.1	LOC109482381	1223103	399	P	S	0.113772	0.00574
	NW_017804242.1	LOC109482381	1223762	452	S	C	0.0364964	0.00574
	NW_017804242.1	LOC109482418	1496987	8	C	F	0.241791	0.0438
	NW_017804242.1	LOC109482418	1497020	19	L	P	0.270588	0.0438
	NW_017804242.1	LOC109482418	1502546	157	R	S	0.0207101	0.00026
	NW_017804242.1	LOC109482418	1502553	160	D	N	0.0146628	0.0289
	NW_017804242.1	LOC109482418	1503766	201	G	R	0.0421456	0.00026
	NW_017804242.1	LOC109482418	1506894	496	Y	C	0.0588235	0.0167
	NW_017804242.1	LOC109482621	2261824	70	M	L	0.487179	0.0314
	NW_017804054.1	LOC109478262	805693	16	A	P	0.0218978	0.0492
	NW_017804054.1	LOC109478262	807368	117	G	E	0.0148699	0.0167
	NW_017802547.1	LOC109462314	161427	5	L	H	0.0119522	0.00026
	NW_017802547.1	LOC109462314	160013	109	P	S	0.0235294	0.043
	NW_017802547.1	LOC109462314	159074	205	L	I	0.061674	0.043
	NW_017802547.1	LOC109462314	159061	209	S	Y	0.165138	0.0346
	NW_017802547.1	LOC109462314	158300	240	T	K	0.0230769	0.0368
	NW_017802547.1	LOC109462314	158262	253	L	M	0.023622	0.00574
	NW_017802547.1	LOC109462314	157540	326	L	V	0.131707	0.0338
	NW_017802392.1	LOC109474268	1277778	23	G	R	0.047619	0.0222
	NW_017802392.1	LOC109474268	1277820	37	A	T	0.0964912	0.00574
	NW_017802392.1	LOC109474268	1277827	39	D	N	0.0104167	0.00026
	NW_017802392.1	LOC109474268	1277826	39	D	A	0.0223214	0.0112
	NW_017802392.1	LOC109474268	1277832	41	G	S	0.00797872	0.00026
	NW_017802392.1	LOC109474268	1279357	54	T	K	0.00810811	0.00574
	NW_017802392.1	LOC109474268	1279359	55	P	T	0.0131332	0.00026
	NW_017802392.1	LOC109474268	1279426	77	T	R	0.0235081	0.00574
	NW_017802392.1	LOC109474268	1290927	253	G	S	0.0531136	0.0167
	NW_017802392.1	LOC109474268	1297211	437	P	S	0.00897666	0.00574
	NW_017802392.1	LOC109474268	1297242	447	L	P	0.0172414	0.00026
carboxypeptidase Z/N	NW_017802636.1	LOC109463160	472068	239	S	N	0.0313901	0.0475
cathepsin L	NW_017803491.1	LOC109469267	1615050	13	A	E	0.0264317	0.0375
	NW_017803491.1	LOC109469267	1615082	24	W	R	0.0926829	0.00026
	NW_017803491.1	LOC109469267	1615096	28	K	N	0.0175439	0.00026
	NW_017803491.1	LOC109469267	1620505	40	E	V	0.0124481	0.0478
	NW_017803491.1	LOC109469277	1806446	38	E	K	0.0275229	0.0167
	NW_017803491.1	LOC109469283	1788711	4	L	M	0.0187668	0.0301
	NW_017803491.1	LOC109469284	1759277	17	D	H	0.0321285	0.00574
	NW_017803491.1	LOC109469284	1758891	43	I	M	0.0252101	0.00574
	NW_017803491.1	LOC109469284	1758811	70	N	S	0.0278884	0.00574
	NW_017803491.1	LOC109469284	1758465	86	G	D	0.0310078	0.0167
	NW_017803491.1	LOC109469284	1757848	146	Q	P	0.0885609	0.00026
	NW_017803491.1	LOC109469284	1757849	146	Q	E	0.0885609	0.00574
	NW_017803491.1	LOC109469284	1757818	156	S	Y	0.0111524	0.00574
	NW_017803491.1	LOC109469284	1756782	283	S	C	0.0184332	0.0314
	NW_017802469.1	LOC109480487	740057	1	T	M	0.0788177	0.0442
	NW_017802469.1	LOC109480487	739962	33	N	Y	0.0271318	0.00026
	NW_017802469.1	LOC109480487	739316	49	Y	N	0.174603	0.00574
	NW_017802469.1	LOC109480487	738448	122	Q	R	0.0686695	0.0301
	NW_017802469.1	LOC109480487	738379	145	K	I	0.0588235	0.0289
	NW_017802469.1	LOC109480487	738338	159	G	S	0.0339806	0.0496
	NW_017802469.1	LOC109480487	737482	191	V	I	0.0588235	0.0222
	NW_017802469.1	LOC109480487	737456	199	I	M	0.108333	0.0472
	NW_017802469.1	LOC109480487	737445	203	S	I	0.0208333	0.0167
	NW_017802469.1	LOC109480487	737355	233	G	D	0.0309735	0.00026
	NW_017802458.1	LOC109479740	639140	6	A	V	0.0446429	0.0375
	NW_017802458.1	LOC109479740	641624	10	A	E	0.0248447	0.00574
	NW_017802458.1	LOC109479740	804301	103	T	A	0.288	0.0112
	NW_017802458.1	LOC109479740	804313	106	L	M	0.016129	0.00026
	NW_017802458.1	LOC109479740	805599	134	T	I	0.0224215	0.0381
	NW_017802458.1	LOC109479740	805608	261	S	F	0.017094	0.0222
cathepsin Z	NW_017804276.1	LOC109483239	416008	7	G	E	0.0336538	0.0167
chitotriosidase 1-like protein (chitinase 3)	NW_017803468.1	LOC109468277	347372	570	K	M	0.026455	0.0438
	NW_017803468.1	LOC109468277	330726	1270	A	P	0.198529	0.0492
	NW_017803468.1	LOC109468277	327431	1407	L	F	0.0401786	0.00026
	NW_017803468.1	LOC109468277	327373	1426	A	V	0.0246914	0.0346
	NW_017803468.1	LOC109468277	327242	1470	L	F	0.110132	0.00574
	NW_017803468.1	LOC109468277	326508	1484	A	T	0.0225225	0.0314
	NW_017803468.1	LOC109468277	324436	1598	G	S	0.0289256	0.0314
	NW_017803468.1	LOC109468277	323466	1631	S	G	0.0471698	0.0417
	NW_017803468.1	LOC109468277	322494	1722	P	A	0.101942	0.0368
defensin-1	NW_017803490.1	LOC109468706	6323241	30	P	L	0.010274	0.0492
endo-beta-1,4-glucanase	NW_017803943.1	LOC109475136	873644	125	S	N	0.0358566	0.0475
ferritin	NW_017804520.1	LOC109487076	1336893	22	Q	K	0.034188	0.0112
	NW_017804520.1	LOC109487076	1338796	119	L	M	0.034632	0.0438
	NW_017804520.1	LOC109487076	1339465	154	L	Q	0.0212766	0.00026
	NW_017804520.1	LOC109487076	1339471	156	R	H	0.0173913	0.0405
	NW_017804209.1	LOC109481673	2142931	36	G	R	0.103321	0.0167
	NW_017804209.1	LOC109481673	2142935	37	D	A	0.0254545	0.0492
gram-negative bacteria-binding protein	NW_017804265.1	LOC109483067	1548404	189	G	E	0.0246914	0.0167
	NW_017804265.1	LOC109483067	1562062	596	S	Y	0.0116959	0.0393
legumain	NW_017804132.1	LOC109480300	1268062	38	L	F	0.0301724	0.00574
	NW_017804132.1	LOC109480300	1271020	106	K	R	0.219124	0.00026
lysozyme	NW_017804231.1	LOC109482051	971312	113	R	H	0.0131004	0.045
	NW_017804231.1	LOC109482051	970861	173	N	K	0.0820312	0.00574
	NW_017804231.1	LOC109482051	970508	200	P	T	0.0109489	0.0492
lysozyme C	NW_017804242.1	LOC109482621	2261243	21	N	K	0.483019	0.0483
	NW_017804242.1	LOC109482621	2261783	56	A	V	0.0114504	0.0353
	NW_017804242.1	LOC109482622	2272834	52	F	Y	0.330961	0.0346
lysozyme G	NW_017804575.1	LOC109487731	4420560	187	G	C	0.0301508	0.00026
methionine adenosyltransferase	NW_017802379.1	LOC109465791	8265249	38	D	N	0.0550459	0.00026
pancreatic lipase-like proteina	NW_017803943.1	LOC109475308	2586123	5	A	P	0.0344828	0.0222
	NW_017803943.1	LOC109475308	2586520	37	L	R	0.0425532	0.0112
	NW_017803943.1	LOC109475308	2587054	132	F	C	0.167665	0.0405
	NW_017803943.1	LOC109475308	2587815	192	D	Y	0.00909091	0.00026
	NW_017803894.1	LOC109472851	131978	790	S	C	0.0153846	0.0222
	NW_017803894.1	LOC109472852	83593	65	L	V	0.0269058	0.036
	NW_017803894.1	LOC109472852	83620	74	A	P	0.12931	0.0301
	NW_017803894.1	LOC109472852	83639	80	L	P	0.0331754	0.0346
	NW_017803894.1	LOC109472852	89061	383	D	Y	0.0217391	0.0368
	NW_017803894.1	LOC109472852	91774	520	R	Q	0.0732601	0.00574
	NW_017803894.1	LOC109472852	92711	541	T	S	0.0526316	0.00574
	NW_017803894.1	LOC109472853	98265	2	L	R	0.00930233	0.0368
	NW_017803894.1	LOC109472856	139709	210	G	C	0.108911	0.00026
	NW_017803894.1	LOC109472856	137578	340	Y	H	0.0240385	0.0393
peroxiredoxin V	NW_017804020.1	LOC109477130	8571233	183	A	V	0.03	0.0167
plasminogen	NW_017804464.1	LOC109486389	3210923	3	L	H	0.327731	0.00574
	NW_017804464.1	LOC109486389	3237512	94	V	M	0.321569	0.0277
	NW_017804464.1	LOC109486389	3238498	195	V	A	0.245536	0.0381
	NW_017804464.1	LOC109486389	3238500	196	L	M	0.0362903	0.0222
	NW_017804464.1	LOC109486389	3238535	207	S	I	0.0316206	0.0375
	NW_017804464.1	LOC109486389	3238534	207	S	R	0.0793651	0.0375
	NW_017803157.1	LOC109466690	554157	38	L	Q	0.0285714	0.046
	NW_017803157.1	LOC109466690	553688	108	G	R	0.0627803	0.00026
	NW_017803157.1	LOC109466690	553089	173	P	Q	0.0853659	0.0167
	NW_017803157.1	LOC109466690	552340	235	A	T	0.00985222	0.00026
	NW_017803157.1	LOC109466690	551440	307	A	S	0.0338983	0.0496
proprotein convertase subtilisin/kexin type 1	NW_017804242.1	LOC109482637	2108195	689	P	R	0.0123457	0.0353
	NW_017804242.1	LOC109482637	2108171	697	P	L	0.0675676	0.0492
	NW_017804242.1	LOC109482637	2108172	697	S	P	0.380488	0.0492
	NW_017804242.1	LOC109482637	2106551	769	L	Q	0.0115385	0.0438
saposin B (countin-1)	NW_017803876.1	LOC109472330	886079	29	L	M	0.330508	0.0301
	NW_017803876.1	LOC109472330	886033	44	S	N	0.0205761	0.0492
serine protease	NW_017803157.1	LOC109466689	545647	68	G	R	0.0380952	0.0167
	NW_017803157.1	LOC109466689	546353	68	G	A	0.0386473	0.0411
	NW_017803157.1	LOC109466689	545646	164	G	E	0.0144928	0.0424
subtilisin-like protease (proteinase T)	NW_017803490.1	LOC109468850	9208604	85	N	Y	0.0519481	0.0405
	NW_017803490.1	LOC109468850	9206782	191	V	A	0.0346535	0.0338
tetraspanin	NW_017804032.1	LOC109477859	1753609	213	L	Q	0.262745	0.0405
	NW_017803954.1	LOC109475594	1293592	31	L	P	0.0187266	0.0222
	NW_017803954.1	LOC109475594	1292703	47	L	F	0.0219298	0.0222
	NW_017803954.1	LOC109475594	1292639	68	V	D	0.0263158	0.0368
	NW_017803954.1	LOC109475594	1292370	101	G	C	0.0852273	0.045
	NW_017803954.1	LOC109475594	1292149	138	L	M	0.285714	0.045
	NW_017803954.1	LOC109475594	1291479	233	D	Y	0.034749	0.045
	NW_017803954.1	LOC109475594	1291227	250	L	M	0.0843882	0.0368
	NW_017803876.1	LOC109472155	1861465	13	S	Y	0.078853	0.0368
	NW_017803876.1	LOC109472155	1861765	15	S	C	0.03663	0.045
	NW_017803876.1	LOC109472155	1861858	46	N	S	0.027907	0.0368
	NW_017803876.1	LOC109472155	1861865	48	Q	H	0.0223214	0.045
	NW_017803876.1	LOC109472155	1861894	58	G	R	0.027907	0.00026
	NW_017803876.1	LOC109472155	1861893	58	G	V	0.0390244	0.00574
	NW_017803876.1	LOC109472155	1862363	115	V	M	0.025	0.0222
	NW_017803876.1	LOC109472155	1862373	118	T	M	0.0788177	0.0368
	NW_017803876.1	LOC109472155	1862421	134	S	C	0.0387931	0.045
	NW_017803876.1	LOC109472155	1862848	171	D	E	0.180672	0.0112
	NW_017803876.1	LOC109472155	1864044	271	H	Y	0.0217391	0.00026
	NW_017803876.1	LOC109472155	1864409	291	P	L	0.0484581	0.0424
	NW_017803876.1	LOC109472155	1864447	304	P	S	0.0900901	0.0277
	NW_017803876.1	LOC109472155	1864965	337	P	L	0.0598291	0.0424
	NW_017803876.1	LOC109472155	1865678	413	R	C	0.0166667	0.00026
	NW_017803876.1	LOC109472155	1865681	414	V	I	0.0465116	0.0438
	NW_017803357.1	LOC109467696	408830	234	R	T	0.1	0.00574
	NW_017803357.1	LOC109467696	408829	234	R	S	0.0944444	0.0222
	NW_017803357.1	LOC109467696	408844	239	D	V	0.435484	0.0436
	NW_017803357.1	LOC109467703	310228	105	G	V	0.012605	0.00026
	NW_017803357.1	LOC109467703	310234	107	L	H	0.0147059	0.0222
	NW_017803357.1	LOC109467703	312652	242	A	E	0.0152672	0.0492
Toll-interacting protein	NW_017803865.1	LOC109471847	814065	213	P	A	0.0464135	0.00574
trypsin-like	NW_017803491.1	LOC109469292	2264710	5	V	F	0.157658	0.045
	NW_017803491.1	LOC109469292	2264728	11	V	F	0.158371	0.045
	NW_017803491.1	LOC109469292	2267802	157	G	S	0.0384615	0.0353
	NW_017803491.1	LOC109469292	2267801	157	G	D	0.374468	0.0277
	NW_017803157.1	LOC109466638	199370	15	P	H	0.0984252	0.0167
	NW_017803157.1	LOC109466638	196730	261	R	H	0.0416667	0.00574
	NW_017803157.1	LOC109466745	3460959	14	G	E	0.0107527	0.0167
	NW_017802991.1	LOC109465650	187725	8	G	E	0.0224719	0.0301
	NW_017802991.1	LOC109465650	189941	163	G	E	0.136564	0.00026
VCBP1	NW_017803135.1	LOC109466477	307101	169	T	P	0.0786517	0.00574
	NW_017803135.1	LOC109466477	307102	169	T	K	0.0625	0.0301
VCBP3	NW_017803898.1	LOC109473042	2266113	39	L	F	0.097561	0.00026
VCBP4	NW_017803135.1	LOC109466491	300000	55	P	L	0.0542986	0.0492
	NW_017803135.1	LOC109466491	299448	101	R	W	0.0304183	0.0381
	NW_017803135.1	LOC109466491	299402	116	G	A	0.0557769	0.0411
	NW_017803135.1	LOC109466491	298515	189	D	H	0.357143	0.0353
	NW_017803135.1	LOC109466491	297759	235	P	Q	0.265432	0.0353
VCBP5	NW_017804220.1	LOC109481848	1560460	7	L	F	0.00985222	0.0167
	NW_017804220.1	LOC109481848	1559667	24	V	E	0.17033	0.00026
	NW_017804220.1	LOC109481848	1559668	24	V	M	0.130435	0.0112
	NW_017804220.1	LOC109481848	1559643	32	P	L	0.046875	0.00026
	NW_017804220.1	LOC109481848	1559576	54	E	D	0.0231214	0.00574
	NW_017804220.1	LOC109481848	1559554	62	S	T	0.0822785	0.00574
	NW_017804220.1	LOC109481848	1559548	64	A	S	0.0350877	0.00026
	NW_017804220.1	LOC109481848	1559539	67	T	A	0.194969	0.0346
	NW_017804220.1	LOC109481848	1559517	74	L	P	0.0243902	0.00026
	NW_017804220.1	LOC109481848	1558702	77	V	M	0.010101	0.043
	NW_017804220.1	LOC109481848	1558687	82	D	N	0.0231481	0.00026
	NW_017804220.1	LOC109481848	1558678	85	V	I	0.0689655	0.0277
	NW_017804220.1	LOC109481848	1558667	88	K	N	0.012931	0.00026
	NW_017804220.1	LOC109481848	1558668	88	K	R	0.5	0.00574
	NW_017804220.1	LOC109481848	1558666	89	W	R	0.15847	0.00026
	NW_017804220.1	LOC109481848	1558663	90	S	R	0.0133929	0.00574
	NW_017804220.1	LOC109481848	1558648	95	V	I	0.0190114	0.0222
	NW_017804220.1	LOC109481848	1558626	102	A	V	0.0205761	0.0375
	NW_017804220.1	LOC109481848	1558617	105	V	A	0.129167	0.00574
	NW_017804220.1	LOC109481848	1558602	110	R	L	0.0289855	0.0277
	NW_017804220.1	LOC109481848	1558554	126	G	D	0.103943	0.0326
	NW_017804220.1	LOC109481848	1557558	178	G	R	0.00996678	0.0444
	NW_017804220.1	LOC109481848	1557492	200	P	A	0.0197368	0.00026
	NW_017804220.1	LOC109481848	1557482	203	C	F	0.0137931	0.036
	NW_017804220.1	LOC109481848	1557476	205	Q	L	0.0467626	0.0314
	NW_017804220.1	LOC109481848	1557474	206	G	R	0.0212014	0.0314
	NW_017804220.1	LOC109481848	1556935	215	V	L	0.144928	0.0301
	NW_017804220.1	LOC109481848	1556919	220	A	D	0.0384615	0.0381
	NW_017804220.1	LOC109481848	1556884	232	I	F	0.0278884	0.0444
	NW_017804220.1	LOC109481848	1556865	238	Y	C	0.0182482	0.0289
	NW_017804220.1	LOC109481848	1556859	240	G	E	0.0695971	0.00026
	NW_017804220.1	LOC109481848	1556857	241	R	G	0.0178571	0.00574
	NW_017804220.1	LOC109481848	1556850	243	S	F	0.177358	0.00574
	NW_017804220.1	LOC109481848	1556277	256	L	M	0.0349854	0.00574
	NW_017804220.1	LOC109481848	1556273	257	T	I	0.0560748	0.00574
	NW_017804220.1	LOC109481848	1556168	292	V	A	0.02589	0.0346
	NW_017804220.1	LOC109481848	1555462	304	T	I	0.027907	0.0346
	NW_017804220.1	LOC109481848	1555427	316	P	A	0.11157	0.00574
	NW_017804220.1	LOC109481848	1555375	333	T	N	0.021978	0.0444
